# Supplementary material for: Inhibitory effect of caveolin-1 in vascular endothelial cells, pericytes and smooth muscle cells
Source: PubMed Central journal article supplement (PMC5652695; doi:10.18632/oncotarget.19191), 2017-07-12
Supplement: oncotarget-08-76165-s001.pdf [file oncotarget-08-76165-s001.pdf]

## Inhibitory effect of caveolin-1 in vascular endothelial cells, pericytes and smooth muscle cells

### SUPPLEMENTARY MATERIALS

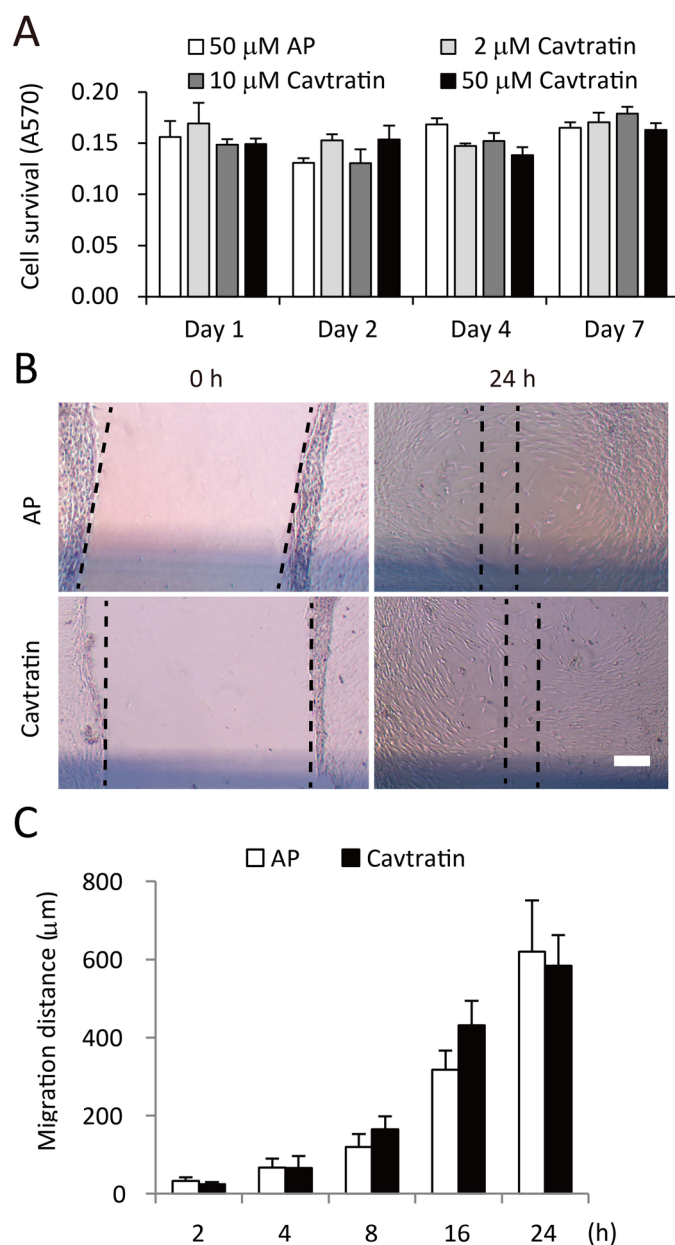

**Supplementary Figure 1: Cavtratin has no effect on the survival or migration of pericytes.** (A) MTT assay of HBVPs cultured with 0.5% serum in the medium. Cells were treated with different concentrations of cavtratin or AP as indicated. A570 indicated the cell survival level. (B and C) Wound healing assay for HBVP migration. Either 50  $\mu$ M cavtratin or AP was applied. Scale bar, 100  $\mu$ m.

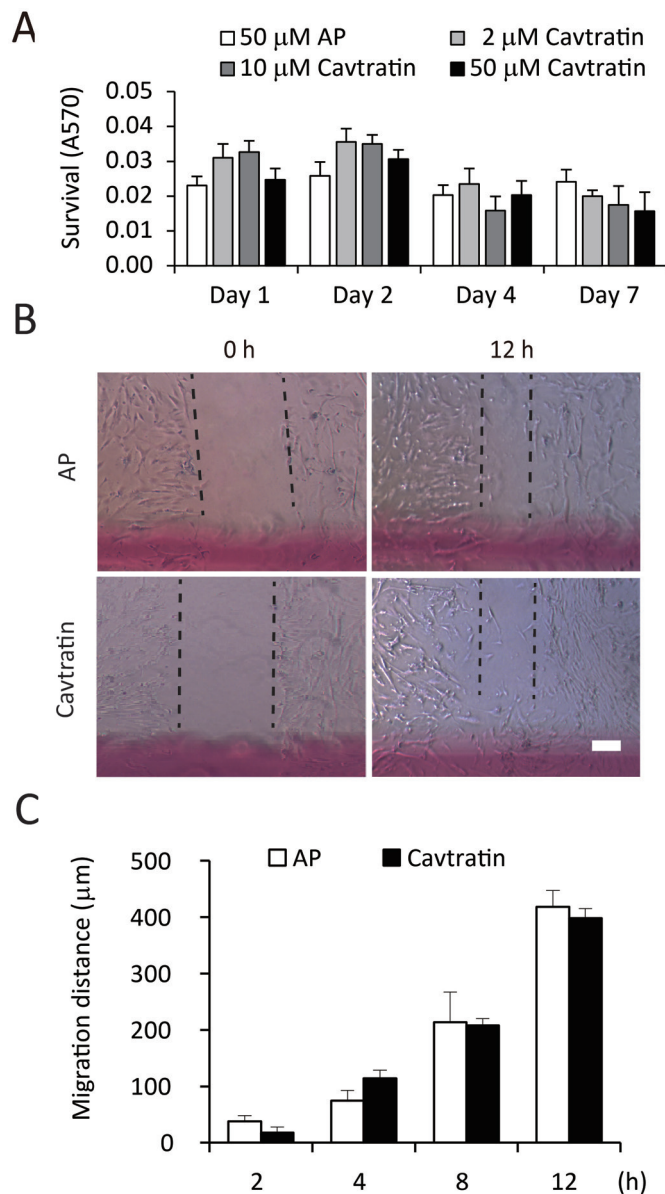

**Supplementary Figure 2: Cavtratin has no effect on the survival or migration of smooth muscle cells.** (A) MTT assay using HUVMSCs cultured with 0.5% serum. Cells were treated with cavtratin or AP. A570 was used as an indicator of cell survival. (B and C) Wound healing assay for HUVMSC migration. Scale bar, 200  $\mu$ m.
